# Supplementary material for: Serum high-sensitivity C-reactive protein and dementia in a community-dwelling Japanese older population (JPSC-AD)
Source: PubMed Central journal article supplement (PMC10978957; doi:10.1038/s41598-024-57922-1), 2024-03-28
Supplement: 41598_2024_57922_MOESM1_ESM.pdf [file 41598_2024_57922_MOESM1_ESM.pdf]

Supplemental Table 1: Methods of serum hs-CRP measurement

|                      |                                    |                                         |
|----------------------|------------------------------------|-----------------------------------------|
| Reagent              | Reagent name                       | N-assay LA CRP-U                        |
|                      | Product number                     | 07E1X80001015330                        |
|                      | Manufacturing company              | Nittobo Medical, Tokyo, Japan           |
| Measuring instrument | Measuring instrument               | JCA-BM9130                              |
|                      | Manufacturing company              | Fukuda Denshi, Tokyo, Japan             |
|                      | Measuring method                   | Latex agglutination turbidimetry method |
| Standardization      | Reference material for calibration | IRMM ERM-DA470                          |

Supplemental Table 2: MRI instruments and acquisition

| Research site                       | Measuring instrument  | Manufacturer             | Field strength         | Sequence | TR/TE/TI (ms)                | Flip angle (°) | FOV (mm) | Acquisition matrix | Voxel size (mm)   |
|-------------------------------------|-----------------------|--------------------------|------------------------|----------|------------------------------|----------------|----------|--------------------|-------------------|
| Hirosaki City, Aomori               | Signa HDxt            | GE Healthcare            | 3 tesla                | SPGR     | 10/4.1/700                   | 10             | 260      | 256 × 256          | 1.0 × 1.0 × 1.2   |
| Yahaba Town, Iwate                  | Intera                | Philips                  | 1.5 tesla              | MPRAGE   | 8.6/4.0/1000                 | 8              | 240      | 192 × 192          | 0.94 × 0.94 × 1.2 |
| Nakajima Town, Nanao City, Kanazawa | ECHELON               | Hitachi                  | 1.5 tesla              | MPRAGE   | 9.2/4.0/1034                 | 8              | 240      | 192 × 192          | 0.94 × 0.94 × 1.2 |
| Arakawa Ward, Tokyo                 | MAGNETOM Spectra      | Siemens                  | 3 tesla                | MPRAGE   | 2300/3.0/900                 | 9              | 270      | 240 × 240          | 1.1 × 1.1 × 1.2   |
| Ama Town, Shimane                   | Achieva               | Philips                  | 1.5 tesla              | MPRAGE   | 8.6/4.0/1000                 | 8              | 240      | 240×240            | 0.94×0.94×1.2     |
| Nakayama Town, Iyo City, Ehime      | Achieva               | Philips                  | 1.5 tesla              | MPRAGE   | 8.6/4.0/1000                 | 8              | 240      | 192 × 192          | 0.94 × 0.94 × 1.2 |
| Hisayama Town, Fukuoka              | Intera                | Philips                  | 1.5 tesla              | MPRAGE   | 8.5/4.0/1000                 | 8              | 240      | 192 × 192          | 0.94 × 0.94 × 1.2 |
| Arao City, Kumamoto                 | Ingenia<br>Signa HDxt | Philips<br>GE Healthcare | 1.5 tesla<br>1.5 tesla | MPRAGE   | 8.6/4.0/1000<br>8.3/3.3/1000 | 9<br>8         | 240      | 192 × 192          | 0.94 × 0.94 × 1.2 |

Abbreviations: TR, repetition time; TE, echo time; TI, inversion time; FOV, field of view; GE, General Electric Company; SPGR, spoiled gradient recalled echo; MPRAGE, magnetization prepared rapid acquisition gradient echo.

Supplemental Table 3. Age- and sex-adjusted and multivariable-adjusted odds ratios for the presence of all-cause dementia and dementia subtypes according to serum high-sensitivity C-reactive protein level after excluding participants with serum hs-CRP of  $\geq 5.0$  mg/L

| Serum hs-CRP,<br>mg/L                      | No. of cases/<br>participants | Age- and sex-adjusted |        | Multivariable-adjusted <sup>a)</sup> |        |
|--------------------------------------------|-------------------------------|-----------------------|--------|--------------------------------------|--------|
|                                            |                               | OR (95%CI)            | p      | OR (95%CI)                           | p      |
| <b>All-cause dementia</b>                  |                               |                       |        |                                      |        |
| <1.0                                       | 367/7465                      | 1.00(reference)       |        | 1.00(reference)                      |        |
| 1.0-1.9                                    | 82/1379                       | 1.08(0.82-1.41)       | 0.60   | 1.04(0.76-1.44)                      | 0.78   |
| 2.0-2.9                                    | 38/442                        | 1.57(1.06-2.32)       | 0.03   | 1.69(1.09-2.64)                      | 0.02   |
| $\geq 3.0$                                 | 36/308                        | 1.80(1.18-2.75)       | 0.007  | 1.84(1.12-3.00)                      | 0.02   |
| P for trend                                |                               |                       | <0.001 |                                      | <0.001 |
| <b>Alzheimer's disease (isolated type)</b> |                               |                       |        |                                      |        |
| <1.0                                       | 269/7465                      | 1.00(reference)       |        | 1.00(reference)                      |        |
| 1.0-1.9                                    | 46/1379                       | 0.77(0.55-1.09)       | 0.14   | 0.72(0.48-1.09)                      | 0.12   |
| 2.0-2.9                                    | 25/442                        | 1.33(0.83-2.11)       | 0.24   | 1.78(1.09-2.92)                      | 0.02   |
| $\geq 3.0$                                 | 23/308                        | 1.40(0.85-2.30)       | 0.19   | 1.81(1.04-3.14)                      | 0.04   |
| P for trend                                |                               |                       | 0.046  |                                      | 0.001  |
| <b>Non-Alzheimer's dementia</b>            |                               |                       |        |                                      |        |
| <1.0                                       | 75/7465                       | 1.00 (reference)      |        | 1.00 (reference)                     |        |
| 1.0-1.9                                    | 28/1379                       | 1.84 (1.18-2.87)      | 0.007  | 2.02 (1.19-3.43)                     | 0.01   |
| 2.0-2.9                                    | 7/442                         | 1.32 (0.60-2.91)      | 0.50   | 0.64 (0.19-2.17)                     | 0.48   |
| $\geq 3.0$                                 | 12/308                        | 2.80 (1.47-5.34)      | 0.002  | 1.80 (0.70-4.59)                     | 0.22   |
| P for trend                                |                               |                       | <0.001 |                                      | 0.08   |

Abbreviations: hs-CRP, high-sensitivity C-reactive protein; OR, odds ratio; CI, confidence interval.

a) Adjusted for age, sex, low education, hypertension, ischemic heart disease, diabetes mellitus, serum total cholesterol, body mass index, chronic kidney disease, electrocardiogram abnormalities, history of stroke, smoking habit, alcohol intake, regular exercise, apolipoprotein E  $\epsilon 4$  carrier status, depression, and research site.
